# Supplementary material for: Reanalysis of long-term series of glaciological and geodetic mass balance for 10 Norwegian glaciers
Source: Copernicus journal article supplement (doi:10.5194/tc-10-535-2016), 2016-03-08
Supplement: Supplementary file 2 [file tc-10-535-2016-supplement.zip]

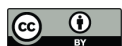

## *Supplement of*

# **Reanalysis of long-term series of glaciological and geodetic mass balance for 10 Norwegian glaciers**

**Liss M. Andreassen et al.**

*Correspondence to:* Liss M. Andreassen (lma@nve.no)

- tc-10-535-2016-supplement-title-page.pdf
- FigureS1.pdf
- Supplement\_text.docx
- Supplement\_text\_TableS1\_FigureS1.pdf
- Table S1\_Nigardsbreen.xlsx

The copyright of individual parts of the supplement might differ from the CC-BY 3.0 licence.
