# Supplementary material for: Reanalysis of long-term series of glaciological and geodetic mass balance for 10 Norwegian glaciers
Source: Copernicus journal article supplement (doi:10.5194/tc-10-535-2016), 2016-03-08
Supplement: Supplementary file 3 [file tc-10-535-2016-supplement.zip]

## Supplementary material

Table S1. Original, homogenized and calibrated mass balance series for Nigardsbreen over the period 1962-2013. The ice divide from 2009/2013 was used for all DTMs. **A-distr**: re-calculation of winter and summer balance from contour method (planimeter) to profile method. **Basin**: re-calculation from glaciological to hydrological basin. **DTM**: re-calculated mass balance series with other DTM using the step approach. **Div**: recalculating the mass balance using the ice divide from 2009/2013. **Dens**: converting from snow depth to water equivalent based on a mathematical trend line/function.

|      | Original mass balance series |                |                |                 |       |     |      |       | Homogenized mass balance series |                |                |                 |       |     |      |       | Calibrated mass balance series |                |                |                 |       |     |      |       | Homogenized with regard to |       |     |      |       | Calib. |
|------|------------------------------|----------------|----------------|-----------------|-------|-----|------|-------|---------------------------------|----------------|----------------|-----------------|-------|-----|------|-------|--------------------------------|----------------|----------------|-----------------|-------|-----|------|-------|----------------------------|-------|-----|------|-------|--------|
| Year | B <sub>w</sub>               | B <sub>s</sub> | B <sub>a</sub> | ΣB <sub>a</sub> | ELA   | AAR | DTM  | Area  | B <sub>w</sub>                  | B <sub>s</sub> | B <sub>a</sub> | ΣB <sub>a</sub> | ELA   | AAR | DTM  | Area  | B <sub>w</sub>                 | B <sub>s</sub> | B <sub>a</sub> | ΣB <sub>a</sub> | ELA   | AAR | DTM  | Area  | A-distr                    | Basin | DTM | Div. | Dens. |        |
| 1962 | 2.88                         | -0.63          | 2.25           | 2.25            | 1260  | 90  | 1964 | 42.19 | 2.11                            | 0.17           | 2.27           | 2.27            | 1 295 | 92  | 1964 | 48.31 | 2.11                           | 0.17           | 2.27           | 2.27            | 1295  | 92  | 1964 | 48.31 | X                          | X     |     | X    |       |        |
| 1963 | 1.87                         | -2.09          | -0.22          | 2.03            | 1550  | 71  | 1964 | 42.19 | 1.78                            | -1.96          | -0.19          | 2.09            | 1 550 | 66  | 1964 | 48.31 | 1.78                           | -1.96          | -0.19          | 2.09            | 1550  | 66  | 1964 | 48.31 | X                          | X     |     | X    |       |        |
| 1964 | 2.13                         | -1.18          | 0.95           | 2.98            | 1400  | 85  | 1964 | 42.19 | 1.96                            | -1.19          | 0.76           | 2.85            | 1 460 | 81  | 1964 | 48.31 | 1.96                           | -1.19          | 0.76           | 2.85            | 1460  | 81  | 1964 | 48.31 | X                          | X     |     | X    |       |        |
| 1965 | 2.29                         | -1.38          | 0.91           | 3.89            | 1395  | 85  | 1964 | 40.86 | 1.93                            | -1.17          | 0.76           | 3.61            | 1 410 | 87  | 1964 | 48.31 | 1.93                           | -1.17          | 0.76           | 3.61            | 1410  | 87  | 1964 | 48.31 | X                          | X     |     | X    |       |        |
| 1966 | 1.76                         | -2.68          | -0.92          | 2.97            | 1700  | 33  | 1964 | 40.86 | 1.74                            | -2.69          | -0.95          | 2.66            | 1 695 | 30  | 1964 | 48.31 | 1.74                           | -2.69          | -0.95          | 2.66            | 1695  | 30  | 1964 | 48.31 | X                          | X     |     | X    |       |        |
| 1967 | 3.40                         | -1.24          | 2.16           | 5.13            | 1310  | 89  | 1964 | 40.86 | 2.98                            | -1.18          | 1.80           | 4.46            | 1 330 | 91  | 1964 | 48.31 | 2.98                           | -1.18          | 1.80           | 4.46            | 1330  | 91  | 1964 | 48.31 | X                          | X     |     | X    |       |        |
| 1968 | 2.72                         | -2.50          | 0.22           | 5.35            | 1550  | 67  | 1964 | 47.03 | 2.49                            | -2.41          | 0.09           | 4.54            | 1 555 | 65  | 1964 | 48.31 | 2.49                           | -2.41          | 0.09           | 4.54            | 1555  | 65  | 1964 | 48.31 | X                          |       |     | X    |       |        |
| 1969 | 1.95                         | -3.26          | -1.31          | 4.04            | 1850  | 3   | 1964 | 47.03 | 1.69                            | -3.14          | -1.45          | 3.09            | 1 890 | 1   | 1974 | 48.10 | 1.69                           | -3.14          | -1.45          | 3.09            | 1890  | 1   | 1974 | 48.10 | X                          |       | X   | X    | X     |        |
| 1970 | 1.73                         | -2.29          | -0.56          | 3.48            | 1650  | 42  | 1964 | 47.03 | 1.67                            | -2.30          | -0.63          | 2.46            | 1 655 | 41  | 1974 | 48.10 | 1.67                           | -2.30          | -0.63          | 2.46            | 1655  | 41  | 1974 | 48.10 | X                          |       | X   | X    | X     |        |
| 1971 | 2.11                         | -1.29          | 0.82           | 4.30            | 1400  | 87  | 1964 | 46.40 | 2.17                            | -1.31          | 0.85           | 3.32            | 1 425 | 85  | 1974 | 48.10 | 2.17                           | -1.31          | 0.85           | 3.32            | 1425  | 85  | 1974 | 48.10 | X                          |       | X   | X    | X     |        |
| 1972 | 1.88                         | -2.02          | -0.14          | 4.16            | 1570  | 62  | 1964 | 46.56 | 1.79                            | -2.02          | -0.23          | 3.09            | 1 595 | 57  | 1974 | 48.10 | 1.79                           | -2.02          | -0.23          | 3.09            | 1595  | 57  | 1974 | 48.10 | X                          |       | X   | X    | X     |        |
| 1973 | 2.40                         | -1.30          | 1.10           | 5.26            | 1410  | 86  | 1964 | 46.61 | 2.47                            | -1.41          | 1.06           | 4.15            | 1 405 | 87  | 1974 | 48.10 | 2.47                           | -1.41          | 1.06           | 4.15            | 1405  | 87  | 1974 | 48.10 | X                          |       | X   | X    | X     |        |
| 1974 | 2.06                         | -1.58          | 0.48           | 5.74            | 1490  | 77  | 1974 | 47.21 | 1.93                            | -1.72          | 0.21           | 4.36            | 1 540 | 68  | 1974 | 48.10 | 1.93                           | -1.72          | 0.21           | 4.36            | 1540  | 68  | 1974 | 48.10 | X                          |       |     | X    | X     |        |
| 1975 | 2.50                         | -2.23          | 0.27           | 6.01            | 1450  | 82  | 1974 | 48.20 | 2.43                            | -2.41          | 0.02           | 4.38            | 1 520 | 72  | 1974 | 48.10 | 2.43                           | -2.41          | 0.02           | 4.38            | 1520  | 72  | 1974 | 48.10 | X                          |       |     | X    | X     |        |
| 1976 | 2.88                         | -2.48          | 0.40           | 6.41            | 1540  | 67  | 1974 | 48.20 | 2.87                            | -2.44          | 0.44           | 4.82            | 1 530 | 70  | 1974 | 48.10 | 2.87                           | -2.44          | 0.44           | 4.82            | 1530  | 70  | 1974 | 48.10 | X                          |       |     | X    |       |        |
| 1977 | 1.52                         | -2.29          | -0.77          | 5.64            | 1650  | 42  | 1974 | 48.20 | 1.49                            | -2.33          | -0.83          | 3.98            | 1 670 | 37  | 1974 | 48.10 | 1.49                           | -2.33          | -0.83          | 3.98            | 1670  | 37  | 1974 | 48.10 | X                          |       |     | X    | X     |        |
| 1978 | 2.12                         | -2.25          | -0.13          | 5.51            | 1590  | 57  | 1974 | 48.20 | 2.00                            | -2.24          | -0.24          | 3.74            | 1 610 | 53  | 1974 | 48.10 | 2.00                           | -2.24          | -0.24          | 3.74            | 1610  | 53  | 1974 | 48.10 | X                          |       |     | X    |       |        |
| 1979 | 2.75                         | -2.04          | 0.71           | 6.22            | 1500  | 75  | 1974 | 48.20 | 2.43                            | -2.10          | 0.34           | 4.08            | 1 560 | 64  | 1984 | 48.86 | 2.43                           | -2.10          | 0.34           | 4.08            | 1560  | 64  | 1984 | 48.86 | X                          |       | X   | X    | X     |        |
| 1980 | 1.77                         | -2.99          | -1.22          | 5.00            | 1730  | 22  | 1974 | 48.20 | 1.76                            | -3.03          | -1.28          | 2.80            | 1 735 | 22  | 1984 | 48.86 | 1.76                           | -3.03          | -1.28          | 2.80            | 1735  | 22  | 1984 | 48.86 | X                          |       | X   | X    |       |        |
| 1981 | 2.19                         | -1.88          | 0.31           | 5.31            | 1560  | 63  | 1974 | 48.20 | 2.19                            | -1.98          | 0.21           | 3.02            | 1 150 | 66  | 1984 | 48.86 | 2.19                           | -1.98          | 0.21           | 3.02            | 1150  | 66  | 1984 | 48.86 | X                          |       | X   | X    | X     |        |
| 1982 | 1.94                         | -2.36          | -0.42          | 4.89            | 1600  | 55  | 1974 | 48.20 | 1.88                            | -2.30          | -0.42          | 2.60            | 1 615 | 52  | 1984 | 48.86 | 1.88                           | -2.30          | -0.42          | 2.60            | 1615  | 52  | 1984 | 48.86 | X                          |       | X   | X    | X     |        |
| 1983 | 3.02                         | -1.93          | 1.09           | 5.98            | 1445  | 83  | 1974 | 48.20 | 2.94                            | -2.03          | 0.91           | 3.51            | 1 455 | 81  | 1984 | 48.86 | 2.94                           | -2.03          | 0.91           | 3.51            | 1455  | 81  | 1984 | 48.86 | X                          |       | X   | X    | X     |        |
| 1984 | 2.49                         | -2.15          | 0.34           | 6.32            | 1500  | 75  | 1974 | 48.20 | 2.49                            | -2.30          | 0.19           | 3.70            | 1 530 | 70  | 1984 | 48.86 | 2.49                           | -2.30          | 0.19           | 3.70            | 1530  | 70  | 1984 | 48.86 | X                          |       | X   | X    |       |        |
| 1985 | 1.77                         | -1.87          | -0.10          | 6.22            | 1590  | 57  | 1974 | 48.20 | 1.74                            | -2.21          | -0.47          | 3.23            | 1 655 | 42  | 1984 | 48.86 | 1.60                           | -2.39          | -0.79          | 2.91            | 1690  | 32  | 1984 | 48.86 | X                          |       | X   | X    | X     | X      |
| 1986 | 1.61                         | -1.71          | -0.10          | 6.12            | 1590  | 57  | 1974 | 48.20 | 1.49                            | -1.78          | -0.29          | 2.94            | 1 615 | 52  | 1984 | 48.86 | 1.34                           | -1.95          | -0.62          | 2.29            | 1645  | 44  | 1984 | 48.86 | X                          |       | X   | X    | X     | X      |
| 1987 | 2.73                         | -1.25          | 1.48           | 7.60            | 1350  | 90  | 1974 | 48.20 | 2.68                            | -1.46          | 1.22           | 4.16            | 1 400 | 87  | 1984 | 48.86 | 2.47                           | -1.57          | 0.90           | 3.19            | 1460  | 80  | 1984 | 48.86 | X                          |       | X   | X    | X     | X      |
| 1988 | 2.24                         | -3.13          | -0.89          | 6.71            | 1660  | 39  | 1984 | 47.82 | 2.21                            | -3.18          | -0.97          | 3.19            | 1 680 | 35  | 1984 | 48.86 | 2.08                           | -3.37          | -1.30          | 1.89            | 1720  | 25  | 1984 | 48.86 | X                          |       |     | X    | X     | X      |
| 1989 | 4.05                         | -0.85          | 3.20           | 9.91            | 1175  | 94  | 1984 | 47.82 | 3.62                            | -0.87          | 2.75           | 5.93            | 1 220 | 93  | 1984 | 48.86 | 3.36                           | -0.93          | 2.42           | 4.32            | 1280  | 92  | 1984 | 48.86 |                            |       |     | X    | X     | X      |
| 1990 | 3.52                         | -1.75          | 1.77           | 11.68           | 1430  | 84  | 1984 | 47.82 | 3.55                            | -2.10          | 1.44           | 7.38            | 1 410 | 86  | 1984 | 48.86 | 3.34                           | -2.22          | 1.12           | 5.44            | 1450  | 82  | 1984 | 48.86 |                            |       |     | X    | X     | X      |
| 1991 | 1.95                         | -1.75          | 0.20           | 11.88           | 1520  | 71  | 1984 | 47.82 | 1.95                            | -1.87          | 0.08           | 7.46            | 1 530 | 70  | 1984 | 48.86 | 1.79                           | -2.03          | -0.24          | 5.20            | 1585  | 59  | 1984 | 48.86 |                            |       |     | X    | X     | X      |
| 1992 | 3.16                         | -1.56          | 1.60           | 13.48           | 1360  | 89  | 1984 | 47.82 | 2.88                            | -1.43          | 1.46           | 8.92            | 1 360 | 89  | 1984 | 48.86 | 2.66                           | -1.53          | 1.13           | 6.33            | 1410  | 86  | 1984 | 48.86 |                            |       |     | X    | X     | X      |
| 1993 | 3.13                         | -1.28          | 1.85           | 15.33           | 1300  | 92  | 1984 | 47.82 | 2.74                            | -1.30          | 1.45           | 10.36           | 1 375 | 89  | 1984 | 48.86 | 2.52                           | -1.40          | 1.12           | 7.45            | 1410  | 86  | 1984 | 48.86 |                            |       |     | X    | X     | X      |
| 1994 | 2.28                         | -1.72          | 0.56           | 15.89           | 1400  | 87  | 1984 | 47.82 | 2.19                            | -1.71          | 0.48           | 10.84           | 1 425 | 85  | 1984 | 48.86 | 2.01                           | -1.85          | 0.15           | 7.60            | 1500  | 75  | 1984 | 48.86 |                            |       |     | X    | X     | X      |
| 1995 | 3.16                         | -1.97          | 1.19           | 17.08           | 1320  | 91  | 1984 | 47.82 | 3.05                            | -1.91          | 1.14           | 11.98           | 1 325 | 91  | 1984 | 48.86 | 2.85                           | -2.03          | 0.82           | 8.42            | 1360  | 90  | 1984 | 48.86 |                            |       |     | X    | X     | X      |
| 1996 | 1.40                         | -1.81          | -0.41          | 16.67           | 1660  | 39  | 1984 | 47.82 | 1.39                            | -1.81          | -0.42          | 11.56           | 1 630 | 48  | 1984 | 48.86 | 1.25                           | -1.99          | -0.74          | 7.68            | 1690  | 32  | 1984 | 48.86 |                            |       |     | X    |       | X      |
| 1997 | 2.66                         | -2.62          | 0.04           | 16.71           | 1500  | 75  | 1984 | 47.82 | 2.60                            | -2.81          | -0.21          | 11.35           | 1 620 | 51  | 2009 | 47.93 | 2.45                           | -2.98          | -0.53          | 7.15            | 1690  | 32  | 2009 | 47.93 |                            |       | X   | X    | X     | X      |
| 1998 | 2.50                         | -1.53          | 0.97           | 17.68           | 1350  | 90  | 1984 | 47.82 | 2.48                            | -1.70          | 0.78           | 12.14           | 1 415 | 86  | 2009 | 47.93 | 2.29                           | -1.83          | 0.46           | 7.61            | 1470  | 80  | 2009 | 47.93 |                            |       | X   | X    | X     | X      |
| 1999 | 2.38                         | -2.21          | 0.17           | 17.85           | 1470  | 79  | 1984 | 47.82 | 2.38                            | -2.23          | 0.14           | 12.28           | 1 460 | 81  | 2009 | 47.93 | 2.21                           | -2.39          | -0.18          | 7.43            | 1575  | 62  | 2009 | 47.93 |                            |       | X   | X    | X     | X      |
| 2000 | 3.38                         | -1.66          | 1.72           | 19.57           | 1250  | 93  | 1984 | 47.82 | 3.34                            | -1.75          | 1.59           | 13.87           | 1 295 | 92  | 2009 | 47.93 | 3.13                           | -1.86          | 1.27           | 8.70            | 1325  | 91  | 2009 | 47.93 |                            |       | X   | X    | X     | X      |
| 2001 | 1.75                         | -1.97          | -0.22          | 19.35           | 1560  | 64  | 1984 | 47.82 | 1.84                            | -1.92          | -0.08          | 13.80           | 1 515 | 73  | 2009 | 47.93 | 1.69                           | -2.09          | -0.40          | 8.30            | 1600  | 56  | 2009 | 47.93 |                            |       | X   | X    | X     | X      |
| 2002 | 2.41                         | -3.30          | -0.89          | 18.46           | 1715  | 25  | 1984 | 47.82 | 2.38                            | -3.28          | -0.90          | 12.89           | 1 730 | 23  | 2009 | 47.93 | 2.24                           | -3.47          | -1.23          | 7.07            | 1805  | 10  | 2009 | 47.93 |                            |       | X   | X    | X     | X      |
| 2003 | 1.56                         | -2.72          | -1.16          | 17.30           | >1960 | 0   | 1984 | 47.82 | 1.60                            | -2.80          | -1.20          | 11.70           | >1957 | 0   | 2009 | 47.93 | 1.49                           | -3.01          | -1.52          | 5.55            | >1957 | 0   | 2009 | 47.93 |                            |       | X   | X    | X     | X      |
| 2004 | 1.97                         | -2.01          | -0.04          | 17.26           | 1530  | 70  | 1984 | 47.82 | 1.99                            | -2.07          | -0.07          | 11.62           | 1 550 | 67  | 2009 | 47.93 | 1.83                           | -2.23          | -0.40          | 5.15            | 1610  | 54  | 2009 | 47.93 |                            |       | X   | X    | X     | X      |
| 2005 | 2.80                         | -1.70          | 1.10           | 18.36           | 1395  | 87  | 1984 | 47.82 | 2.92                            | -1.71          | 1.21           | 12.84           | 1 390 | 88  | 2009 | 47.93 | 2.72                           | -1.83          | 0.89           | 6.04            | 1430  | 85  | 2009 | 47.93 |                            |       | X   | X    | X     | X      |
| 2006 | 1.75                         | -3.15          | -1.40          | 16.96           | 1850  | 4   | 1984 | 47.82 | 1.74                            | -3.15          | -1.40          | 11.43           | 1 830 | 7   | 2009 | 47.93 | 1.63                           | -3.36          | -1.73          | 4.31            | >1957 | 0   | 2009 | 47.93 |                            |       | X   | X    |       | X      |
| 2007 | 3.09                         | -2.05          | 1.05           | 18.01           | 1320  | 91  | 1984 | 47.82 | 3.05                            | -2.07          | 0.98           | 12.42           | 1 320 | 91  | 2009 | 47.93 | 2.86                           | -2.20          | 0.66           | 4.97            | 1365  | 90  | 2009 | 47.93 |                            |       | X   | X    |       | X      |
| 2008 | 3.01                         | -1.92          |                |                 |       |     |      |       |                                 |                |                |                 |       |     |      |       |                                |                |                |                 |       |     |      |       |                            |       |     |      |       |        |
