# Supplementary figures and images for: Reanalysis of long-term series of glaciological and geodetic mass balance for 10 Norwegian glaciers
Source: Copernicus journal article supplement (doi:10.5194/tc-10-535-2016), 2016-03-08

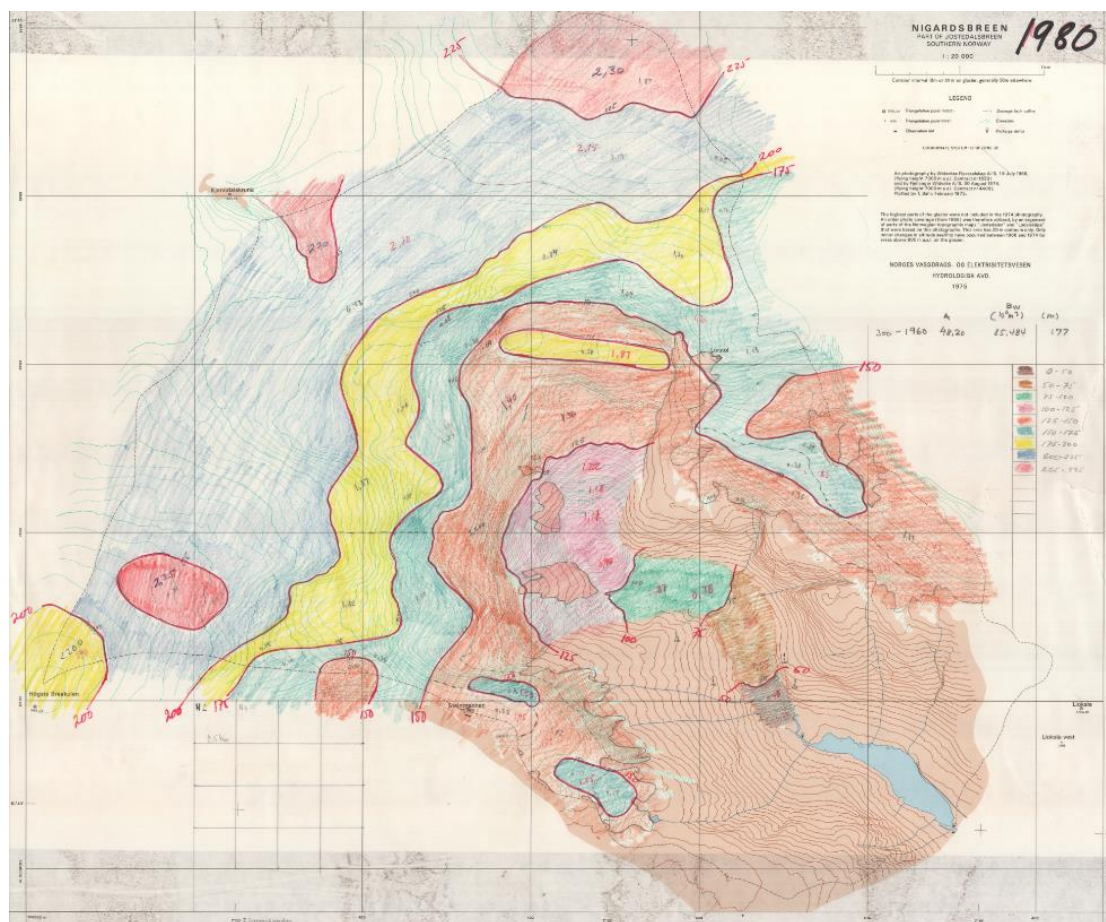

Supplement: Supplementary file 1 [file tc-10-535-2016-supplement.zip]
